# Supplementary material for: A theoretical study on the effect of C60 particles on the growth of coronene radical based on HACA pathway
Source: Royal Society of Chemistry journal article supplement (doi:10.1039/d3cp01341c), 2023-01-01
Supplement: d3cp01341c1.pdf [file d3cp01341c1.pdf]

**Supplementary material of**

**A theoretical study about the effect of C<sub>60</sub> particle on the growth of  
coronene radical based on the HACA pathway**

*Shanshan Ruan<sup>a</sup>, Ying Shi<sup>a</sup>, Chunlan Qin<sup>a</sup>, Kangwei Xu<sup>a</sup>, Chenliang He<sup>a</sup>, Lidong  
Zhang<sup>a,b\*</sup>*

<sup>a</sup>National Synchrotron Radiation Laboratory, University of Science and Technology of  
China, Hefei, Anhui, 230029, P. R. China.

<sup>b</sup> State Key Laboratory of Fire Science, University of Science and Technology of China,  
Hefei, Anhui, 230026, P. R. China

● **Rate coefficients in modified Arrhenius expression.**

**Table S1.** Modified Arrhenius parameters of high-pressure limit rate coefficients for C<sub>2</sub>H<sub>2</sub> addition to R1 and R2.  $k = A T^n \exp(-E/RT)$ . The units of E are cal/mol. Units of rate constants for bimolecular and unimolecular reactions are cm<sup>3</sup>molecule<sup>-1</sup>s<sup>-1</sup> and s<sup>-1</sup>, respectively. The bath gas is Ar.

| Reactions                               | A        | n        | E        |
|-----------------------------------------|----------|----------|----------|
| R1+C <sub>2</sub> H <sub>2</sub> →INT1' | 8.08E-21 | 2.62E+00 | 1.40E+03 |
| R2+C <sub>2</sub> H <sub>2</sub> →INT1  | 1.20E-20 | 2.60E+00 | 5.32E+02 |
| INT1→INT2                               | 1.36E+11 | 3.13E-01 | 1.69E+04 |
| INT1→INT2-2                             | 1.12E+11 | 2.98E-01 | 1.39E+04 |
| INT1→INT3                               | 6.87E+07 | 1.35E+00 | 7.24E+03 |
| INT2→PC2                                | 4.96E+07 | 1.48E+00 | 6.23E+03 |
| INT2-2→PC1                              | 1.59E+10 | 1.11E+00 | 2.76E+04 |
| INT3→INT4                               | 1.34E+11 | 2.90E-01 | 1.24E+04 |
| INT4→PC1                                | 5.13E+10 | 1.01E+00 | 4.79E+04 |
| INT4→PC2                                | 2.99E+10 | 9.84E-01 | 4.55E+04 |
| INT1'→INT2'                             | 3.24E+11 | 2.50E-01 | 1.84E+04 |
| INT1'→INT3'                             | 1.77E+08 | 1.21E+00 | 8.94E+03 |
| INT3'→INT4'                             | 1.24E+11 | 2.96E-01 | 1.26E+04 |
| INT2'→PC1'                              | 8.61E+09 | 1.13E+00 | 2.58E+04 |
| INT4'→PC1'                              | 9.69E+10 | 1.02E+00 | 4.77E+04 |

**Table S2.** Modified Arrhenius parameters of high-pressure limit rate coefficients for C<sub>2</sub>H<sub>2</sub> addition to R3 and R4.  $k = A T^n \exp(-E/RT)$ . The units of E are cal/mol. Units of rate constants for bimolecular and unimolecular reactions are cm<sup>3</sup>molecule<sup>-1</sup>s<sup>-1</sup> and s<sup>-1</sup>, respectively. The bath gas is Ar.

| Reactions                               | A        | n        | E        |
|-----------------------------------------|----------|----------|----------|
| R3+C <sub>2</sub> H <sub>2</sub> →INT9  | 7.22E-24 | 3.08E+00 | 2.30E+04 |
| R4+C <sub>2</sub> H <sub>2</sub> →INT15 | 1.83E-22 | 2.60E+00 | 1.10E+04 |
| INT9→INT10                              | 5.99E+11 | 2.17E-01 | 5.21E+03 |
| INT10→INT11                             | 2.84E+12 | 1.77E-01 | 2.56E+03 |
| INT11→INT12                             | 8.02E+07 | 1.53E+00 | 5.73E+04 |
| INT12→INT13                             | 6.44E+01 | 3.24E+00 | 1.74E+04 |
| INT12→INT14                             | 2.02E+11 | 2.91E-01 | 1.78E+04 |
| INT13→PC3                               | 3.12E+11 | 5.58E-01 | 1.06E+04 |
| INT14→PC4                               | 8.48E+11 | 5.12E-01 | 1.33E+04 |
| INT15→INT16                             | 5.66E+11 | 2.11E-01 | 3.52E+03 |
| INT16→INT17                             | 8.38E+12 | 1.06E-01 | 5.95E+03 |
| INT17→INT18                             | 2.74E+07 | 1.38E+00 | 3.87E+04 |
| INT18→INT19                             | 1.11E+02 | 3.22E+00 | 1.75E+04 |
| INT18→INT20                             | 1.20E+11 | 2.98E-01 | 1.60E+04 |
| INT19→PC3                               | 1.97E+12 | 3.22E-01 | 2.01E+04 |
| INT20→PC4                               | 1.32E+13 | 2.42E-01 | 2.08E+04 |
